# Supplementary material
Source: Springer Nature journal article supplement (https://www.springermedizin.de/resource/supplementary/13019_2013_1412_MOESM1_ESM.pdf/9640606)

Number of Title/Abstracts Screened in PubMed Search: 2121

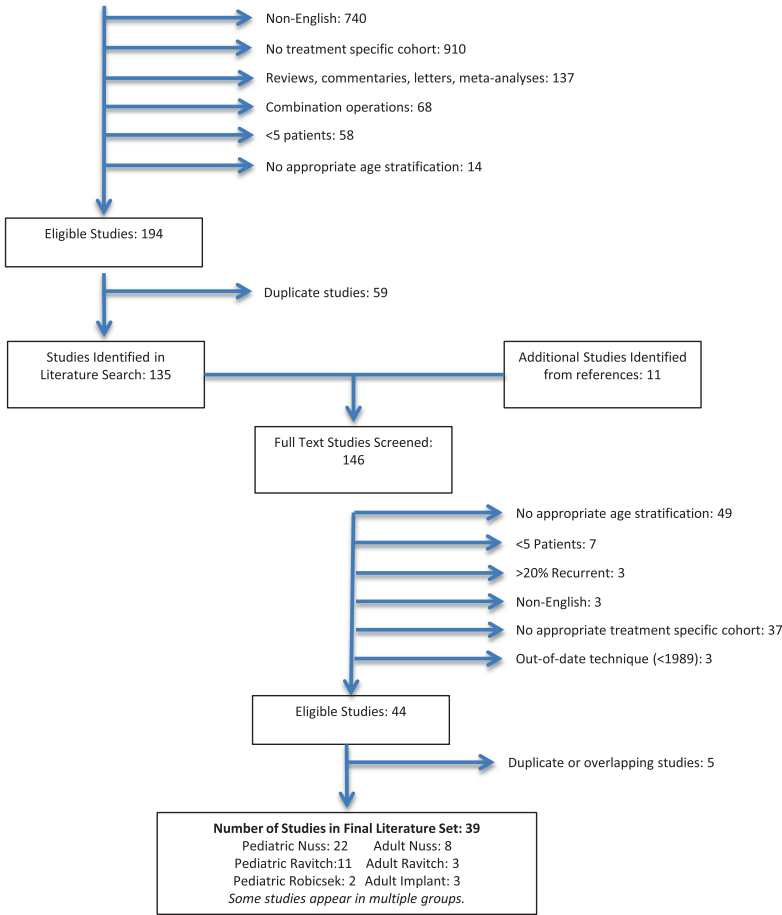

Supplement: MOESM1 [file 9640606]
